# Supplementary material
Source: ML conference proceedings conference paper supplement (https://proceedings.mlr.press/v37/hugginsb15.html)
Supplement: Supplementary file [file hugginsb15-supp.pdf]

**SUPPLEMENTARY MATERIAL FOR  
RISK AND REGRET OF  
HIERARCHICAL BAYESIAN LEARNERS**

JONATHAN H. HUGGINS AND JOSHUA B. TENENBAUM

APPENDIX A. REGRET BOUNDS FOR NON-GLM LIKELIHOODS

Recall Proposition 2.1, restated here for convenience:

**Proposition.** *The Bayesian cumulative loss is bounded as*

$$L_{Bayes}(Z_T) \leq L_Q(Z_T) + \text{KL}(Q||P_0). \quad (\text{A.1})$$

*Proof of Theorem 2.4.* Fix a choice of  $\theta^*$  and  $\phi$  and write  $Q = Q_{\theta^*, \phi}$ . Take a second-order Taylor expansion of  $f_y$  about  $z^*$ , yielding

$$f_y(z) = f_y(z^*) + f'_y(z^*)^\top (z - z^*) + \frac{1}{2} (z - z^*)^\top f''_y(\zeta(z))(z - z^*),$$

for some function  $\zeta$ . Let  $z = (\xi \mathbf{x}, \psi)$  with  $\theta \sim Q$  and let  $z^* = \mathbb{E}[z] = (\xi^* \mathbf{x}, \psi^*)$ . Hence,

$$\begin{aligned} \mathbb{E}_z[f_y(z)] &= f_y(z^*) + f'_y(z^*)^\top \mathbf{0} + \frac{1}{2} \mathbb{E}_z [(z - z^*)^\top f''_y(\zeta(z))(z - z^*)] \\ &\leq f_y(z^*) + \frac{c}{2} \mathbb{E}_z [(z - z^*)^\top (z - z^*)]. \end{aligned}$$

Defining

$$\omega \triangleq (\underbrace{\mathbf{x}, \dots, \mathbf{x}}_{n' \text{ times}}, \underbrace{1, \dots, 1}_{n'' \text{ times}}),$$

we next observe that

$$(z - z^*)^\top (z - z^*) = \omega^\top (\theta - \theta^*) (\theta - \theta^*)^\top \omega. \quad (\text{A.2})$$

Letting  $\Sigma = \text{Var}[\theta]$ , we thus have

$$\begin{aligned} \mathbb{E}_z [(z - z^*)^\top (z - z^*)] &= \omega^\top \mathbb{E}_\theta [(\theta - \theta^*) (\theta - \theta^*)^\top] \omega \\ &\leq \|\omega\|_2^2 \|\mathbb{E}_\theta [(\theta - \theta^*) (\theta - \theta^*)^\top]\| \\ &= (n' \|\mathbf{x}\|_2^2 + n'') \|\Sigma\| \\ &\leq (n' + n'') \|\Sigma\| \end{aligned}$$

since it is assumed that  $\|\mathbf{x}\|_2 \leq 1$ . Noting that  $L_Q(Z_T) = \sum_t \mathbb{E}_Q [f_{y_t}(\xi \mathbf{x}_t, \psi)]$  and  $L_{\theta^*}(Z_T) = \sum_t f_{y_t}(\xi^* \mathbf{x}_t, \psi^*)$ , we have

$$L_Q(Z_T) \leq L_{\theta^*}(Z_T) + \frac{Tc(n' + n'') \|\Sigma\|}{2}. \quad (\text{A.3})$$

Combining (A.1) and (A.3) yields the theorem.  $\square$

*Proof of Theorem 2.2.* Follows as a special case of Theorem 2.4 by choosing  $n' = 1$  and  $n'' = 0$ .  $\square$

**A.1. Application to Multi-class Logistic Regression.** For multi-class logistic regression (MLR)  $y \in \{1, \dots, K\}$  is one of  $K$  classes, the parameters are  $\theta = \{\theta^{(k)}\}_{k=1}^K$ , and the likelihood is

$$p(y | \theta, \mathbf{x}) = \frac{\exp(\theta^{(y)} \cdot \mathbf{x})}{\sum_{k=1}^K \exp(\theta^{(k)} \cdot \mathbf{x})}. \quad (\text{A.4})$$

In order to apply Theorem 2.4, we require the following result:

**Proposition A.1.** *Assumption (A1') holds for the MLR likelihood with  $c = 1/2$ .*

*Proof.* First note that

$$f_y(\mathbf{z}) = -z_y + \ln \sum_{k=1}^K e^{z_i}, \quad (\text{A.5})$$

where  $z_i = \boldsymbol{\theta}^{(k)} \cdot \mathbf{x}$ , and hence the Hessian of  $f_y(\mathbf{z})$  is independent of  $y$ :

$$f_y''(\mathbf{z}) = \frac{1}{\left(\sum_{k=1}^K e^{z_i}\right)^2} \begin{pmatrix} \sum_{i \neq 1} e^{z_1+z_i} & -e^{z_1+z_2} & \dots & -e^{z_1+z_K} \\ -e^{z_2+z_1} & \sum_{i \neq 2} e^{z_2+z_i} & \dots & -e^{z_2+z_K} \\ \vdots & \vdots & \ddots & \vdots \end{pmatrix} \quad (\text{A.6})$$

Applying Gershgorin's circle theorem, we find that

$$\|f_y''(\mathbf{z})\| \leq \frac{2e^{z_1} \sum_{i \neq 1} e^{z_i}}{\left(\sum_{k=1}^K e^{z_k}\right)^2}, \quad (\text{A.7})$$

where with loss of generality we have applied the theorem to the first row of the Hessian. Defining  $a \triangleq e^{z_1} \geq 0$  and  $b \triangleq \sum_{i \neq 1} e^{z_i} \geq 0$ , we have  $\|f_y''(\mathbf{z})\| \leq \frac{2ab}{(a+b)^2}$ . Maximization over the positive orthant occurs at  $a = b > 0$ , so  $\|f_y''(\mathbf{z})\| \leq 1/2$ .  $\square$

Reasoning similarly to Theorem E.1, one can easily prove:

**Theorem A.2** (Hierarchical Gaussian regret, multi-class regression). *If  $\boldsymbol{\theta}_j^{(1:K)} \sim \mathcal{N}(\mathbf{0}, \Sigma)$ ,  $j = 1, \dots, n$ , then using the MLR likelihood guarantees that  $\mathcal{R}(Z, \boldsymbol{\theta}^*)$  is bounded by*

$$R_{\text{Bayes}}^{\text{mlr-HG}}(Z, \boldsymbol{\theta}^*) \triangleq \frac{1}{2\gamma^2} \sum_{k=1}^K \|\boldsymbol{\theta}^{*(k)}\|^2 + \frac{\sigma_0^2}{\sigma^2 \gamma^2} \sum_{k < \ell} \|\boldsymbol{\theta}^{*(k)} - \boldsymbol{\theta}^{*(\ell)}\|^2 + \frac{n}{2} \ln \left(1 + \frac{K\sigma_0^2}{\sigma^2}\right) + \frac{nK}{2} \ln \left(1 - \frac{\sigma_0^2}{\gamma^2} + \frac{T\sigma^2}{2n}\right), \quad (\text{A.8})$$

where  $\gamma^2 \triangleq K\sigma_0^2 + \sigma^2$ .

Theorem 2.5 follows as a special case of Theorem A.2 by taking  $\sigma_0^2 = 0$ .

## APPENDIX B. PROOF OF THEOREM 3.2

Since  $p_T(\boldsymbol{\theta}) = \frac{p(Y|X, \boldsymbol{\theta})p_0(\boldsymbol{\theta})}{p(Y|X)}$ ,

$$\begin{aligned} \text{KL}(P_T \| P_0) &= \mathbb{E}_{P_T} \left[ \ln \frac{p_T(\boldsymbol{\theta})}{p_0(\boldsymbol{\theta})} \right] \\ &= \mathbb{E}_{P_T} \left[ \ln \frac{p(Y|X, \boldsymbol{\theta})}{p(Y|X)} \right] \\ &= L_{\text{Bayes}}(Z_T) - L_{P_T}(Z_T). \end{aligned} \quad (\text{B.1})$$

Combining (2) and (B.1) with Theorem 3.1 implies that with probability  $1 - \delta$ , for all  $\boldsymbol{\theta}$ ,

$$|\mathcal{L}(P_T) - \hat{\mathcal{L}}(P_T, Z_T)| \leq \sqrt{\kappa} \sqrt{\frac{L_{\boldsymbol{\theta}}(Z_T) - L_{P_T}(Z_T) + B(\boldsymbol{\theta}) + C(T) + \ln \kappa' / \delta}{T}}.$$

Observing that  $L_{\boldsymbol{\theta}^*}(Z_T) < L_{P_T}(Z_T)$ , so  $L_{\boldsymbol{\theta}^*}(Z_T) - L_{P_T}(Z_T) < 0$ , completes the proof.

## APPENDIX C. KL DIVERGENCE DERIVATIONS

**C.1. Multivariate Gaussians.** Let  $D_i = \mathcal{N}(\mu_i, \Sigma_i)$ ,  $i = 1, 2$ , where  $\dim(\mu_i) = n$ . Then

$$\begin{aligned}
\text{KL}(D_1||D_2) &= \frac{1}{2} \mathbb{E}_{D_1} \left[ \ln \frac{|\Sigma_2|}{|\Sigma_1|} - (x - \mu_1)^\top \Sigma_1^{-1} (x - \mu_1) + (x - \mu_2)^\top \Sigma_2^{-1} (x - \mu_2) \right] \\
&= \frac{1}{2} \left\{ \ln \frac{|\Sigma_2|}{|\Sigma_1|} + \mathbb{E}_{D_1} \left[ -\text{Tr}(\Sigma_1^{-1} (x - \mu_1)^\top (x - \mu_1)) + \text{Tr}(\Sigma_2^{-1} (x - \mu_2)^\top (x - \mu_2)) \right] \right\} \\
&= \frac{1}{2} \left\{ \ln \frac{|\Sigma_2|}{|\Sigma_1|} - \text{Tr}(\Sigma_1^{-1} \Sigma_1) + \mathbb{E}_{D_1} \left[ \text{Tr}(\Sigma_2^{-1} (x^\top x - 2x^\top \mu_2 + \mu_2^\top \mu_2)) \right] \right\} \\
&= \frac{1}{2} \left\{ \ln \frac{|\Sigma_2|}{|\Sigma_1|} - n + \mathbb{E}_{D_1} \left[ \text{Tr}(\Sigma_2^{-1} (x^\top x - 2x^\top \mu_2 + \mu_2^\top \mu_2)) \right] \right\} \\
&= \frac{1}{2} \left\{ \ln \frac{|\Sigma_2|}{|\Sigma_1|} - n + \text{Tr}(\Sigma_2^{-1} (\Sigma_1 + \mu_1^\top \mu_1 - 2\mu_1^\top \mu_2 + \mu_2^\top \mu_2)) \right\} \\
&= \frac{1}{2} \left\{ \ln \frac{|\Sigma_2|}{|\Sigma_1|} - n + \text{Tr}(\Sigma_2^{-1} \Sigma_1) + (\mu_1 - \mu_2)^\top \Sigma_2^{-1} (\mu_1 - \mu_2) \right\}.
\end{aligned}$$

**C.2. Gaussian and  $t$ -Distribution.** Let  $D_1 = \mathcal{N}(\mu_1, \Sigma_1)$  and  $D_2 = \mathcal{T}_\nu(\mu_2, \Sigma_2)$ , where  $\dim(\mu_i) = k$ . Then

$$\begin{aligned}
\text{KL}(D_1||D_2) &= \ln \left( \frac{\Gamma(\frac{\nu}{2}) \nu^{k/2}}{\Gamma(\frac{\nu+k}{2})} \right) + \frac{k}{2} \ln \pi + \frac{1}{2} \ln |\Sigma_2| - \frac{k}{2} \ln 2\pi e - \frac{1}{2} \ln |\Sigma_1| \\
&\quad + \frac{\nu+k}{2} \mathbb{E}_{D_1} \left[ \ln \left( 1 + \frac{1}{\nu} (x - \mu_2)^\top \Sigma_2^{-1} (x - \mu_2) \right) \right] \\
&= \ln \left( \frac{\Gamma(\frac{\nu}{2}) \nu^{k/2}}{\Gamma(\frac{\nu+k}{2})} \right) + \frac{1}{2} \ln \frac{|\Sigma_2|}{|\Sigma_1|} - \frac{k}{2} \ln 2e \\
&\quad + \frac{\nu+k}{2} \mathbb{E}_{D_1} \left[ \ln \left( 1 + \frac{1}{\nu} (x - \mu_2)^\top \Sigma_2^{-1} (x - \mu_2) \right) \right].
\end{aligned}$$

For the first term, if  $k$  is even, then

$$\frac{\Gamma(\frac{\nu}{2}) \nu^{k/2}}{\Gamma(\frac{\nu+k}{2})} = \frac{\nu^{k/2}}{(\frac{\nu+k}{2})^{k/2}},$$

where  $y^n = y(y-1)\dots(y-n+1)$  is the descending factorial. Now assume  $k$  is odd. By Gautschi's inequality,  $\frac{\Gamma(a)}{\Gamma(a+1/2)} \leq \left(\frac{2a+1}{2a^2}\right)^{1/2}$ . Choosing  $a = \nu/2$  yields

$$\frac{\Gamma(\frac{\nu}{2}) \nu^{k/2}}{\Gamma(\frac{\nu+k}{2})} = \frac{\Gamma(\frac{\nu}{2}) \nu^{1/2} \nu^{(k-1)/2}}{\Gamma(\frac{\nu+1}{2}) (\frac{\nu+k}{2})^{(k-1)/2}} \leq \frac{(\nu+1)^{1/2} \nu^{(k-1)/2}}{(\frac{\nu}{2})^{1/2} (\frac{\nu+k}{2})^{(k-1)/2}}.$$

Now, bounding the expectation gives

$$\begin{aligned}
&\mathbb{E}_{D_1} \left[ \ln \left( 1 + \frac{1}{\nu} (x - \mu_2)^\top \Sigma_2^{-1} (x - \mu_2) \right) \right] \\
&\leq \ln \left( 1 + \frac{1}{\nu} \mathbb{E}_{D_1} \left[ (x - \mu_2)^\top \Sigma_2^{-1} (x - \mu_2) \right] \right) \\
&= \ln \left( 1 + \frac{1}{\nu} \text{Tr}(\Sigma_2^{-1} \Sigma_1) + \frac{1}{\nu} (\mu_1 - \mu_2)^\top \Sigma_2^{-1} (\mu_1 - \mu_2) \right) \\
&\leq \ln \left( 1 + \frac{1}{\nu} (\mu_1 - \mu_2)^\top \Sigma_2^{-1} (\mu_1 - \mu_2) \right) + \frac{\text{Tr}(\Sigma_2^{-1} \Sigma_1)}{\nu + (\mu_1 - \mu_2)^\top \Sigma_2^{-1} (\mu_1 - \mu_2)} \\
&\leq \ln \left( 1 + \frac{1}{\nu} (\mu_1 - \mu_2)^\top \Sigma_2^{-1} (\mu_1 - \mu_2) \right) + \frac{1}{\nu} \text{Tr}(\Sigma_2^{-1} \Sigma_1),
\end{aligned}$$

where the second inequality follows from the fact that  $\ln(a+b) \leq \ln(a) + b/a$ . Combining everything yields

$$\begin{aligned}
\text{KL}(D_1||D_2) &\leq \ln \Lambda_{\nu,k} + \frac{1}{2} \ln \frac{|\Sigma_2|}{|\Sigma_1|} - \frac{k}{2} \ln 2e + \frac{\nu+k}{2\nu} \text{Tr}(\Sigma_2^{-1} \Sigma_1) \\
&\quad + \frac{\nu+k}{2} \ln \left( 1 + \frac{1}{\nu} (\mu_1 - \mu_2)^\top \Sigma_2^{-1} (\mu_1 - \mu_2) \right),
\end{aligned}$$

where

$$\Lambda_{\nu,k} = \begin{cases} \frac{\nu^{k/2}}{(\frac{\nu+k}{2})^{k/2}} & \text{if } k \text{ is even} \\ \frac{(\nu+1)^{1/2} \nu^{(k-1)/2}}{(\frac{\nu}{2})^{1/2} (\frac{\nu+k}{2})^{(k-1)/2}} & \text{if } k \text{ is odd.} \end{cases}$$

**C.3. Gaussian and Laplace.** Let  $D_1 = \mathcal{N}(\mu, \sigma^2)$  and  $D_2 = \text{Lap}(\beta)$ . Then

$$\begin{aligned} \text{KL}(D_1||D_2) &= \ln(2\beta) + \frac{1}{\beta} \mathbb{E}_{D_1}[|x|] - \frac{1}{2} \ln(2\pi e \sigma^2) \\ &= \ln(2\beta) + \frac{1}{2\beta} \left[ \mu \text{Erf} \left( \frac{\mu}{\sqrt{2}\sigma} \right) + \frac{2\sqrt{2}\sigma}{\sqrt{\pi}} \exp \left\{ -\frac{\mu^2}{2\sigma^2} \right\} \right] - \frac{1}{2} \ln(2\pi e \sigma^2) \\ &\leq \frac{1}{2} \ln \frac{2\beta^2}{\sigma^2} + \frac{1}{2\beta} \left[ |\mu| \sqrt{1 - \exp \left\{ -\frac{2\mu^2}{\pi\sigma^2} \right\}} + \frac{2\sqrt{2}\sigma}{\sqrt{\pi}} \exp \left\{ -\frac{\mu^2}{2\sigma^2} \right\} \right] - \frac{1}{2} \ln(\pi e). \end{aligned}$$

#### APPENDIX D. PROOF OF THEOREM 4.1

Choose  $Q_{\theta^*, \phi} = \mathcal{N}(\theta^*, \phi^2 I)$ . With  $P_0 = \mathcal{J}_\nu(\mathbf{0}, \sigma^2 I)$ , we have (Appendix C.2)

$$\text{KL}(Q_{\theta^*, \phi} || P_0) \leq \ln \Lambda_{\nu,n} + \frac{n}{2} \ln \frac{\sigma^2}{\phi^2} - \frac{n}{2} \ln 2e + \frac{n(\nu+n)}{2\nu} \frac{\phi^2}{\sigma^2} + \frac{\nu+n}{2} \ln \left( 1 + \frac{1}{\nu\sigma^2} \|\theta^*\|^2 \right),$$

where

$$\Lambda_{\nu,n} = \begin{cases} \frac{\nu^{n/2}}{(\frac{\nu+n}{2})^{n/2}} & \text{if } n \text{ is even} \\ \frac{(\nu+1)^{1/2} \nu^{(n-1)/2}}{(\frac{\nu}{2})^{1/2} (\frac{\nu+n}{2})^{(n-1)/2}} & \text{if } n \text{ is odd.} \end{cases}$$

Note that if  $n$  is even then  $\frac{\Lambda_{\nu,n}}{2^{n/2}} \leq 1$  and if  $n$  is odd then  $\frac{\Lambda_{\nu,n}}{2^{n/2}} \leq \frac{\nu+1}{\nu}$ . Since  $\text{Var}_{Q_{\theta^*, \phi}}[\theta_i] = \phi^2$ , we have

$$L_{\text{Bayes}}(Z) \leq \inf_{\theta^*} L_{\theta^*}(Z) + \frac{Tc\phi^2}{2} + \frac{n}{2} \ln \frac{\nu+1}{\nu} + \frac{n}{2} \ln \frac{\sigma^2}{\phi^2} - \frac{n}{2} + \frac{n(\nu+n)}{2\nu} \frac{\phi^2}{\sigma^2} + \frac{\nu+n}{2} \ln \left( 1 + \frac{1}{\nu\sigma^2} \|\theta^*\|^2 \right)$$

Choosing  $\phi^2 = \frac{\nu\sigma^2 n}{Tc\nu\sigma^2 + (\nu+n)n}$  yields the theorem.

#### APPENDIX E. MORE ON HIERARCHICAL PRIORS FOR SHARING STATISTICAL STRENGTH

**E.1. Multiple Simultaneous Observations.** The Bayesian learner receives  $K$  input-output pairs  $\{(\mathbf{x}_t^{(k)}, y_t^{(k)})\}_{k=1}^K$  at each time step. Each output is predicted using a separate weight vector  $\theta^{(k)}$ , so the  $k$ -th likelihood is  $p(y|\theta^{(k)} \cdot \mathbf{x})$ ,  $k = 1, \dots, K$ . Write  $Z^{(k)} \triangleq \{(\mathbf{x}_t^{(k)}, y_t^{(k)})\}_{t=1}^T$ . Instead of using independent Gaussian priors on  $\theta^{(1)}, \dots, \theta^{(K)}$ , place a prior over the means of the  $K$  priors. For each dimension  $j = 1, \dots, n$ , let

$$\mu_j | \sigma_0^2 \sim \mathcal{N}(0, \sigma_0^2) \tag{E.1}$$

and

$$\theta_j^{(k)} | \mu_j, \sigma^2 \sim \mathcal{N}(\mu_j, \sigma^2), \quad k = 1, \dots, K, \tag{E.2}$$

and write  $\theta_j^{(1:K)} \triangleq (\theta_j^{(1)}, \dots, \theta_j^{(K)})$ . Integrating out  $\mu_j$  yields

$$\theta_j^{(1:K)} | \sigma_0^2, \sigma^2 \sim \mathcal{N}(\mathbf{0}, \Sigma), \tag{E.3}$$

where, with  $1_K$  denoting the  $K \times K$  all-ones matrix,

$$\Sigma \triangleq s^2 \rho 1_K + s^2 (1 - \rho) I \quad s^2 \triangleq \sigma_0^2 + \sigma^2 \quad \rho \triangleq \frac{\sigma_0^2}{\sigma_0^2 + \sigma^2}, \tag{E.4}$$

The Bayesian learner uses this hierarchical prior to simultaneously predict  $y_t^{(1)}, \dots, y_t^{(K)}$ . For the following theorem, we must replace (A2) with an appropriately modified assumption for the simultaneous prediction task:

$$\|\mathbf{x}_t^{(k)}\|_2 \leq 1 \quad \text{for all } t, k. \tag{A2'}$$

**Theorem E.1** (Hierarchical Gaussian regret, simultaneous observations). *If  $\boldsymbol{\theta}_j^{(1:K)} \sim \mathcal{N}(\mathbf{0}, \Sigma)$ ,  $j = 1, \dots, n$ , and (A2') holds in lieu of (A2), then  $\mathcal{R}(Z, \boldsymbol{\theta}^*)$  is bounded by*

$$R_{Bayes}^{HG-sim}(Z, \boldsymbol{\theta}^*) \triangleq \frac{1}{2\gamma^2} \sum_{k=1}^K \|\boldsymbol{\theta}^{*(k)}\|^2 + \frac{\sigma_0^2}{\sigma^2\gamma^2} \sum_{k<\ell} \|\boldsymbol{\theta}^{*(k)} - \boldsymbol{\theta}^{*(\ell)}\|^2 + \frac{n}{2} \ln \left( 1 + \frac{K\sigma_0^2}{\sigma^2} \right) + \frac{nK}{2} \ln \left( 1 - \frac{\sigma_0^2}{\gamma^2} + \frac{Tc\sigma^2}{n} \right), \quad (\text{E.5})$$

where  $\gamma^2 \triangleq K\sigma_0^2 + \sigma^2$ .

It is instructive to compare the upper bound given in (E.5) to  $\sum_k R_{Bayes}^G(Z_{(k)}, \boldsymbol{\theta}^{*(k)})$  with prior variance  $s^2 = \sigma_0^2 + \sigma^2$ . To do so, we find  $\Delta(\boldsymbol{\theta}^*) \triangleq \sum_k R_{Bayes}^G(Z_{(k)}, \boldsymbol{\theta}^{*(k)}) - R_{Bayes}^{HG}(Z, \boldsymbol{\theta}^*)$ :

$$\begin{aligned} \Delta(\boldsymbol{\theta}^*) &= \frac{(K-1)\sigma_0^2}{2\gamma^2 s^2} \sum_{k=1}^K \|\boldsymbol{\theta}^{*(k)}\|^2 - \frac{\sigma_0^2}{\sigma^2\gamma^2} \sum_{k<\ell} \|\boldsymbol{\theta}^{*(k)} - \boldsymbol{\theta}^{*(\ell)}\|^2 \\ &\quad - \frac{nK}{2} \ln \left( \frac{n\frac{s^2}{\sigma^2} \left( 1 - \frac{\sigma_0^2}{\gamma^2} \right) + Tcs^2}{n + Tcs^2} \right) - \frac{n}{2} \ln \left( \left[ 1 + \frac{K\sigma_0^2}{\sigma^2} \right] \frac{\sigma^{2K}}{s^{2K}} \right) \end{aligned}$$

For example, setting  $\sigma_0 = \sigma$ , so the correlation  $\rho$  is  $1/2$ , and  $K = 2$ , we find that if

$$4\|\boldsymbol{\theta}^{*(1)} - \boldsymbol{\theta}^{*(2)}\|^2 + 6s^2 n \ln \left( \frac{\frac{4}{3}n + Tcs^2}{n + Tcs^2} \right) \leq \|\boldsymbol{\theta}^{*(1)}\|^2 + \|\boldsymbol{\theta}^{*(2)}\|^2 + 0.863s^2 n,$$

then the hierarchical model has a smaller regret bound than the non-hierarchical model.<sup>1</sup> As long as  $Tcs^2 > 2n$ , the condition becomes  $4\|\boldsymbol{\theta}^{*(1)} - \boldsymbol{\theta}^{*(2)}\|^2 \leq \|\boldsymbol{\theta}^{*(1)}\|^2 + \|\boldsymbol{\theta}^{*(2)}\|^2 + Cs^2 n$  for some  $0 < C < 0.863$ . In this case there are two important observations about the benefits of the hierarchical model. First, noting that the expected magnitude of  $\|\boldsymbol{\theta}^{*(1)}\|^2$  and  $\|\boldsymbol{\theta}^{*(2)}\|^2$  is  $\sigma^2 n$ , as long as  $\|\boldsymbol{\theta}^{*(1)}\|^2$  and  $\|\boldsymbol{\theta}^{*(2)}\|^2$  are only a constant fraction  $C/4$  of their expected magnitudes, the hierarchical model will always have smaller regret bound. Second, even if the previous condition does not hold, the difference in  $\|\boldsymbol{\theta}^{*(1)} - \boldsymbol{\theta}^{*(2)}\|^2$  must be significantly larger than the expected magnitudes of  $\|\boldsymbol{\theta}^{*(1)}\|^2$  and  $\|\boldsymbol{\theta}^{*(2)}\|^2$  for the hierarchical model to have a larger regret bound than the non-hierarchical model. Thus, the use of the hierarchical model has potentially significantly reduced regret compared to the non-hierarchical model.

**E.2. Two-level Prior.** In this section we derive bounds for the two-level prior in the case of sequential observations. Recall that the prior is

$$\boldsymbol{\beta} \sim \mathcal{N}(0, \sigma_0^2 I) \quad (\text{E.6})$$

$$\boldsymbol{\mu}^{(s)} \sim \mathcal{N}(\boldsymbol{\beta}, \sigma_1^2 I) \quad s = 1, \dots, S \quad (\text{E.7})$$

$$\boldsymbol{\theta}^{(k)} \sim \mathcal{N}(\boldsymbol{\mu}^{(s_k)}, \sigma_2^2 I) \quad k = 1, \dots, K. \quad (\text{E.8})$$

Integrating out  $\boldsymbol{\beta}$ , we immediately obtain:

$$\boldsymbol{\mu}_i^{(1:S)} \sim \mathcal{N}(\mathbf{0}, \Sigma_\mu), \quad (\text{E.9})$$

where  $\Sigma_\mu \triangleq \sigma_0^2 \mathbf{1}_S + \sigma_1^2 I$ . Writing  $\boldsymbol{\mu}_i = \boldsymbol{\mu}_i^{(1:S)}$  and  $\boldsymbol{\theta}_i = \boldsymbol{\theta}_i^{(1:K)}$ , we have

$$\begin{pmatrix} \boldsymbol{\mu}_i \\ \boldsymbol{\theta}_i \end{pmatrix} \sim \mathcal{N}(\mathbf{0}, \Sigma), \quad \Sigma \triangleq \begin{pmatrix} \Sigma_\mu & \Sigma_{\mu\theta} \\ \Sigma_{\mu\theta}^\top & \Sigma_\theta \end{pmatrix}. \quad (\text{E.10})$$

Hence,

$$\boldsymbol{\theta}_i | \boldsymbol{\mu}_i \sim \mathcal{N}(\Sigma_{\mu\theta}^\top \Sigma_\mu^{-1} \boldsymbol{\mu}_i, \Sigma_\theta - \Sigma_{\mu\theta}^\top \Sigma_\mu^{-1} \Sigma_{\mu\theta}). \quad (\text{E.11})$$

Define the matrix  $P$  such that  $P_{ks} = \mathbf{1}\{s = s_k\}$ . We therefore have  $\Sigma_{\mu\theta}^\top \Sigma_\mu^{-1} \boldsymbol{\mu}_i = P \boldsymbol{\mu}_i$  and hence  $\Sigma_{\mu\theta}^\top = P \Sigma_\mu$ , and furthermore  $\Sigma_\theta - \Sigma_{\mu\theta}^\top \Sigma_\mu^{-1} \Sigma_{\mu\theta} = \sigma_2^2 I$  and hence  $\Sigma_\theta = \sigma_2^2 I + P \Sigma_\mu P^\top$ .

Hence, the prior on  $\boldsymbol{\theta}_i$  is  $P_0 = \mathcal{N}(\mathbf{0}, \Sigma_\theta)$ . Choose  $Q_{\boldsymbol{\theta}_i^*, \phi} = \mathcal{N}(\boldsymbol{\theta}_i^*, \text{diag } \boldsymbol{\phi})$ , yielding

$$\text{KL}(Q_{\boldsymbol{\theta}_i^*, \phi} || P_0) = \frac{1}{2} \left\{ \ln \frac{|\Sigma_\theta|}{\prod_k \phi_k^2} - k - \text{Tr}(\Sigma_\theta^{-1}) \sum_k \phi_k^2 + (\boldsymbol{\theta}_i^*)^\top \Sigma_\theta^{-1} \boldsymbol{\theta}_i^* \right\}. \quad (\text{E.12})$$

<sup>1</sup> For clarity, we have replaced  $3 \ln(4/3)$  with the bound 0.863.

Straightforward calculations show that the regret is bounded by

$$\sum_{i=1}^n (\boldsymbol{\theta}_i^*)^\top \Sigma_\theta^{-1} \boldsymbol{\theta}_i^* + \sum_{k=1}^K \frac{n}{2} \ln \left( 2 \text{Tr}(\Sigma_\theta^{-1}) + \frac{cT^{(k)}}{n} \right) + \frac{n}{2} \ln |\Sigma_\theta|. \quad (\text{E.13})$$

**E.3. Proof of Theorem E.1.** First take  $n = 1$ , which will later generalize to arbitrary  $n$ . Choose  $Q_{\boldsymbol{\theta}^{*(1:K)}, \phi} = \mathcal{N}(\boldsymbol{\theta}^{*(1:K)}, \phi^2 I)$  and note that

$$|\Sigma| = \sigma^{2K-2} (K\sigma_0^2 + \sigma^2) = \sigma^{2K-2} \gamma^2 \quad \text{and} \quad \Sigma^{-1} = -\frac{\sigma_0^2}{\sigma^2 \gamma^2} \mathbf{1}_K + \frac{1}{\sigma^2} I.$$

Thus (Appendix C.1)

$$\begin{aligned} \text{KL}(Q_{\boldsymbol{\theta}^{*(1:K)}, \phi} \| P_0) &= \frac{1}{2} \left\{ \ln \frac{|\Sigma|}{|\phi^2 I|} - K + \phi^2 \text{Tr}(\Sigma^{-1}) + (\boldsymbol{\theta}^{*(1:K)})^\top \Sigma^{-1} \boldsymbol{\theta}^{*(1:K)} \right\} \\ &= \frac{K}{2} \ln \frac{\sigma^2 \gamma^{2/K}}{\phi^2 \sigma^{2/K}} - \frac{K}{2} + \frac{K(\gamma^2 - \sigma_0^2)}{2\sigma^2 \gamma^2} \phi^2 \\ &\quad + \frac{1}{2\gamma^2} \sum_{k=1}^K (\boldsymbol{\theta}^{*(k)})^2 + \frac{\sigma_0^2}{\sigma^2 \gamma^2} \sum_{k < \ell} (\boldsymbol{\theta}^{*(k)} - \boldsymbol{\theta}^{*(\ell)})^2. \end{aligned}$$

Moving to the case of general  $n$ , since  $\text{Var}_{Q_{\boldsymbol{\theta}^*, \phi}}[\sum_k \theta_j^{(k)}] = K\phi^2$  for all  $j = 1, \dots, n$ , applying Theorem 2.2 gives

$$\begin{aligned} L_{\text{Bayes}}(Z) &\leq \sum_{k=1}^K L_{\boldsymbol{\theta}^{*(k)}}(Z^{(k)}) + \frac{TKc\phi^2}{2} + \frac{nK}{2} \ln \frac{\sigma^2 \gamma^{2/K}}{\phi^2 \sigma^{2/K}} - \frac{nK}{2} \\ &\quad \frac{nK(\gamma^2 - \sigma_0^2)}{2\sigma^2 \gamma^2} \phi^2 + \frac{1}{2\gamma^2} \sum_{k=1}^K \|\boldsymbol{\theta}^{*(k)}\|^2 + \frac{\sigma_0^2}{\sigma^2 \gamma^2} \sum_{k < \ell} \|\boldsymbol{\theta}^{*(k)} - \boldsymbol{\theta}^{*(\ell)}\|^2. \end{aligned}$$

Choosing  $\phi^2 = \frac{n\sigma^2 \gamma^2}{n(\gamma^2 - \sigma_0^2) + Tc\sigma^2 \gamma^2}$  yields the theorem.

**E.4. Proof of Theorem 4.2.** The proof is similar to that for Theorem E.1. However, use separate variances for each source:

$$Q_{\boldsymbol{\theta}^{*(1:K)}, \phi} = \prod_k Q_{\boldsymbol{\theta}^{*(k)}, \phi_k} = \prod_k \mathcal{N}(\boldsymbol{\theta}^{*(k)}, \phi_k^2).$$

The error term from the Taylor expansion used in Theorem 2.2 is  $\sum_k \frac{T^{(k)} c \phi_k^2}{2}$ , so

$$\begin{aligned} L_{\text{Bayes}}(Z) &\leq \sum_{k=1}^K L_{\boldsymbol{\theta}^{*(k)}}(Z^{(k)}) + \sum_k \frac{T^{(k)} c \phi_k^2}{2} + \frac{n}{2} \ln \frac{\sigma^{2K} \gamma^2}{\sigma^2 \prod_k \phi_k^2} - \frac{nK}{2} \\ &\quad \frac{n(\gamma^2 - \sigma_0^2)}{2\sigma^2 \gamma^2} \sum_k \phi_k^2 + \frac{1}{2\gamma^2} \sum_{k=1}^K \|\boldsymbol{\theta}^{*(k)}\|^2 + \frac{\sigma_0^2}{\sigma^2 \gamma^2} \sum_{k < \ell} \|\boldsymbol{\theta}^{*(k)} - \boldsymbol{\theta}^{*(\ell)}\|^2. \end{aligned}$$

Choosing  $\phi_k^2 = \frac{n\sigma^2 \gamma^2}{n(\gamma^2 - \sigma_0^2) + T^{(k)} c \sigma^2 \gamma^2}$  yields the theorem.

## APPENDIX F. MORE ON FEATURE SELECTION

**F.1. The Bayesian Lasso.** For Bayesian model average learner we have:

**Theorem F.1** (GLM Bayesian lasso regret). *If  $\theta_i \sim \text{Lap}(\theta_i, \beta)$ ,  $i = 1, \dots, n$ , then*

$$\begin{aligned} \mathcal{R}(Z, \boldsymbol{\theta}^*) &\leq \frac{1}{2\beta} \sum_i \min \left\{ \sqrt{\frac{2}{\pi \phi^2}} (\theta_i^*)^2, |\theta_i^*| \right\} \\ &\quad + \frac{n}{2} \ln \left( \frac{2T^2 c^2 \beta^4}{\left( \sqrt{2n^2 + Tcn\beta^2 \pi} - \sqrt{2n^2} \right)^2} \right). \end{aligned} \quad (\text{F.1})$$

In the regime of  $Tc\beta^2 \ll n$ , (F.1) becomes (approximately)

$$\mathcal{R}(Z, \boldsymbol{\theta}^*) \leq \frac{1}{2\beta} \sum_i \min \left\{ \sqrt{\frac{2}{\pi\phi^2}} (\theta_i^*)^2, |\theta_i^*| \right\} + Cn$$

for some constant  $C$  independent of  $\beta$  and  $c$ . Hence, even for sparse  $\boldsymbol{\theta}^*$ , the regret bound is  $\Theta(n)$ . The inequalities used to prove the regret bound are all quite tight, so we conjecture that, up to constant factors, there is a matching lower bound, as least in the Gaussian regression case.

**F.2. Proof of Theorem F.1.** Apply Theorem 2.2 with  $Q_{\boldsymbol{\theta}^*, \phi} = \mathcal{N}(\boldsymbol{\theta}^*, \phi^2 I)$ . Since  $p_0(\boldsymbol{\theta}) = \prod_i \text{Lap}(\theta_i, \beta)$ , we have (see Appendix C.3)

$$\begin{aligned} \text{KL}(Q_{\boldsymbol{\theta}^*, \phi} \| P_0) &\leq \frac{n}{2} \ln \frac{2\beta^2}{\phi^2} - \frac{n}{2} \ln(\pi e) + \frac{1}{2\beta} \sum_i \left[ |\theta_i^*| \sqrt{1 - \exp \left\{ -\frac{2(\theta_i^*)^2}{\pi\phi^2} \right\}} + \frac{2\sqrt{2}\phi}{\sqrt{\pi}} \exp \left\{ -\frac{(\theta_i^*)^2}{2\phi^2} \right\} \right] \\ &\leq \frac{n}{2} \ln \frac{2\beta^2}{\phi^2} - \frac{n}{2} \ln(\pi e) + \frac{\sqrt{2}n\phi}{\sqrt{\pi}\beta} + \frac{1}{2\beta} \sum_i \min \left\{ \sqrt{\frac{2}{\pi\phi^2}} (\theta_i^*)^2, |\theta_i^*| \right\}. \end{aligned}$$

Since  $\text{Var}_{Q_{\boldsymbol{\theta}^*, \phi}}[\theta_i] = \phi^2$ ,

$$L_{\text{Bayes}}(Z) \leq \inf_{\boldsymbol{\theta}^*} L_{\boldsymbol{\theta}^*}(Z) + \frac{Tc\phi^2}{2} - \frac{n}{2} \ln(\pi e) + \frac{\sqrt{2}n\phi}{\sqrt{\pi}\beta} + \frac{n}{2} \ln \frac{2\beta^2}{\phi^2} + \frac{1}{2\beta} \sum_i \min \left\{ \sqrt{\frac{2}{\pi\phi^2}} (\theta_i^*)^2, |\theta_i^*| \right\}.$$

Choosing  $\phi^2 = \frac{(\sqrt{2n^2 + Tcn\beta^2\pi} - \sqrt{2n^2})^2}{T^2c^2\beta^2\pi}$  gives the desired result.

**F.3. Proof of Theorem 4.3.** Fix some  $\boldsymbol{\theta}^*$ . If  $\theta_i^* = 0$ , then let  $Q_{\theta_i^*, \phi^2} = \delta_0$ , so  $\text{KL}(Q_{\theta_i^*, \phi^2} \| P_0) = \ln \frac{1}{p}$ . If  $\theta_i^* \neq 0$ , then let  $Q_{\theta_i^*, \phi^2} = \mathcal{N}(\theta_i^*, \phi^2)$ , so

$$\text{KL}(Q_{\theta_i^*, \phi^2} \| P_0) = \text{KL}(Q_{\theta_i^*, \phi^2} \| \mathcal{N}(0, \sigma^2)) + \ln \frac{1}{1-p}.$$

The rest of the proof of (14) then closely follows earlier ones. To obtain (15), we observe that if  $p = q^{1/n}$ , then

$$m \ln \frac{1}{1-p} = m \ln \frac{1}{1-q^{1/n}} \leq m \ln \frac{n}{1-q}$$

and

$$(n-m) \ln \frac{1}{p} = \frac{n-m}{n} \ln \frac{1}{q} \leq \ln \frac{1}{q}.$$

COMPUTER SCIENCE AND ARTIFICIAL INTELLIGENCE LABORATORY, MIT

URL: <http://jhhuggins.org/>

E-mail address: [jhuggins@mit.edu](mailto:jhuggins@mit.edu)

BRAIN AND COGNITIVE SCIENCE DEPARTMENT, MIT

URL: <http://web.mit.edu/cocosci/josh.html/>

E-mail address: [jbt@mit.edu](mailto:jbt@mit.edu)
